# Supplementary material
Source: Springer Nature journal article supplement (https://www.springermedizin.de/resource/supplementary/12965_2011_94_MOESM3_ESM.pdf/9573092)

1

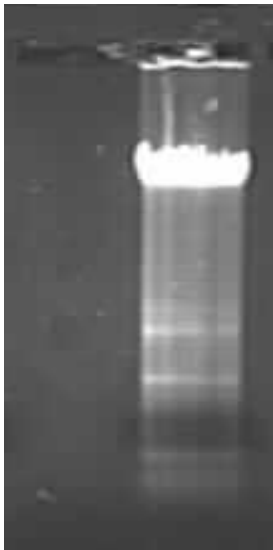

M

2

3

1000 bp  
→

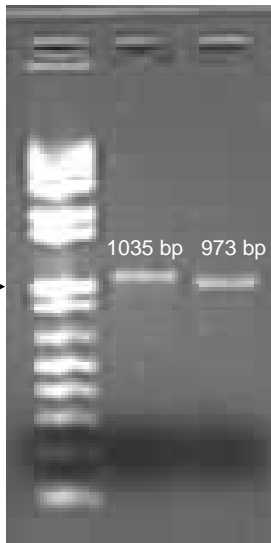

M

4

1000 bp  
→

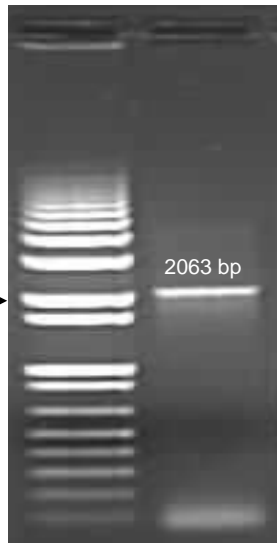

Supplement: MOESM3 [file 9573092]
